# Supplementary material for: Gene Content and Coding Diversity of the Growth Hormone Loci of Apes
Source: MDPI journal article supplement (doi:10.3390/genes14020241), 2023-01-17
Supplement: s1 [file s1]

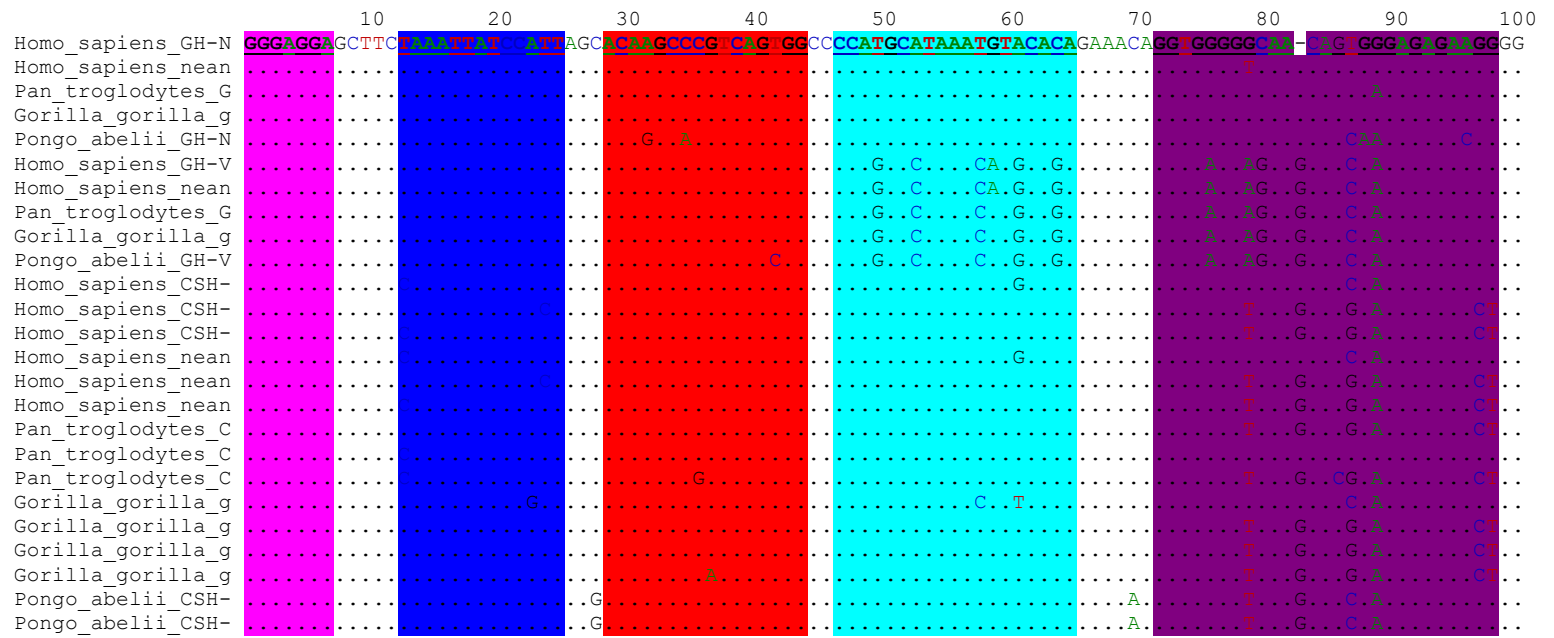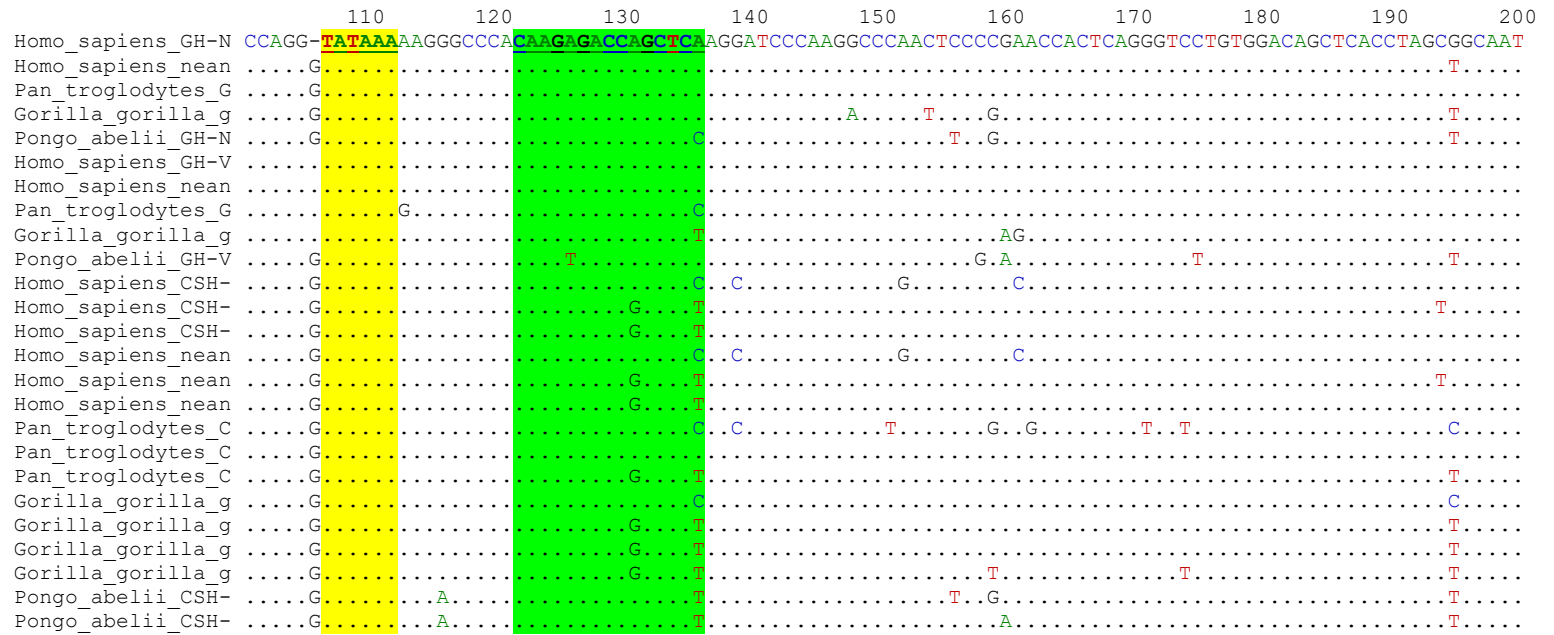

Homo\_sapiens\_GH-N G 199  
Homo\_sapiens\_nean . 200  
Pan\_troglodytes\_G . 200  
Gorilla\_gorilla\_g . 200  
Pongo\_abelii\_GH-N . 200  
Homo\_sapiens\_GH-V . 200  
Homo\_sapiens\_nean . 200  
Pan\_troglodytes\_G . 200  
Gorilla\_gorilla\_g . 200  
Pongo\_abelii\_GH-V . 201  
Homo\_sapiens\_CSH- . 200  
Homo\_sapiens\_CSH- . 201  
Homo\_sapiens\_CSH- . 201  
Homo\_sapiens\_nean . 200  
Homo\_sapiens\_nean . 201  
Homo\_sapiens\_nean . 201  
Pan\_troglodytes\_C . 201  
Pan\_troglodytes\_C . 200  
Pan\_troglodytes\_C . 201  
Gorilla\_gorilla\_g . 200  
Gorilla\_gorilla\_g . 201  
Gorilla\_gorilla\_g . 201  
Gorilla\_gorilla\_g . 201  
Pongo\_abelii\_CSH- . 201  
Pongo\_abelii\_CSH- . 201

Sp-1 distal Pit-1 CRE Proximal Pit-1 TRE TATA InrE

Figure S1 alignments of promoters' nucleotide sequences.
