# Supplementary figures and images for: Gene Content and Coding Diversity of the Growth Hormone Loci of Apes
Source: MDPI journal article supplement (doi:10.3390/genes14020241), 2023-01-17

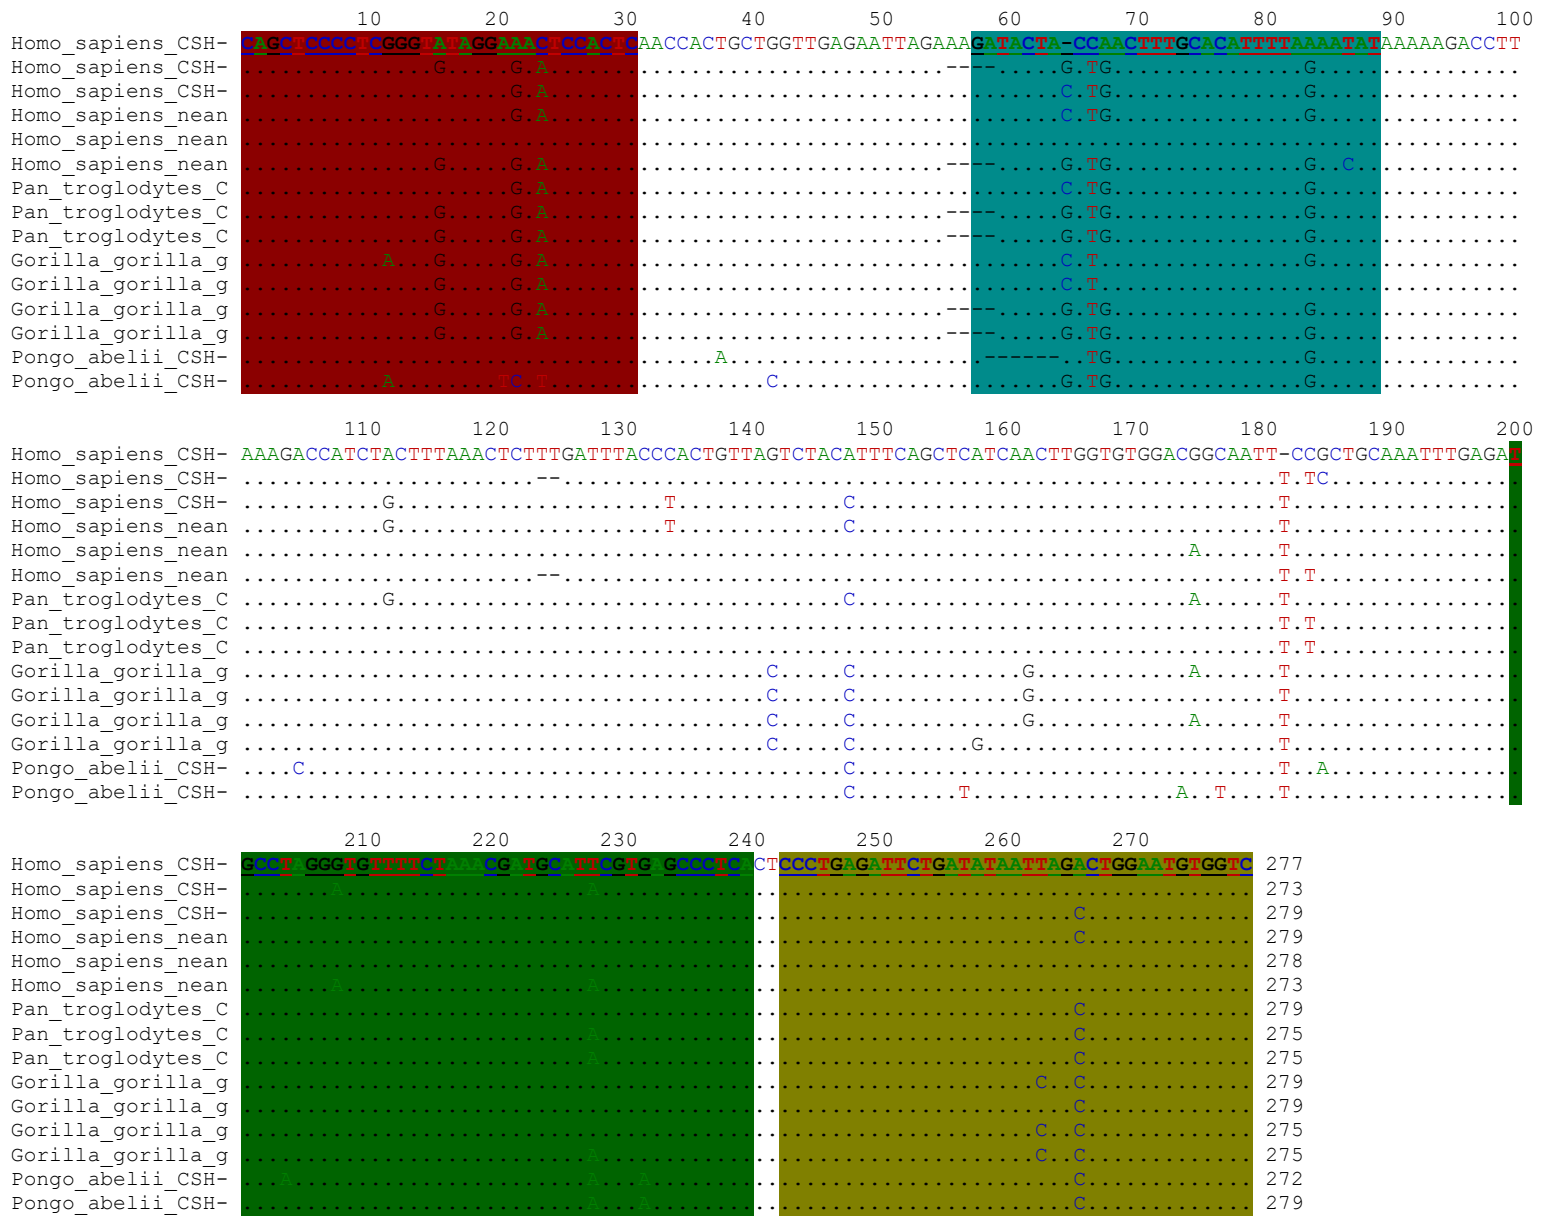

Figure S2 alignments of enhancers nucleotide sequences

Supplement: s1 [file s1]
